# Supplementary material
Source: PubMed Central journal article supplement (PMC1785253)
Supplement: pnas_0607097104_6.pdf [file pnas_0607097104_6.pdf]

**Table 1. Fit parameters for bead models of unfolded proteins**

| <b>Protein and conditions</b>   | <b><math>\epsilon = 0.0</math>, <math>\sigma</math> varies</b> | <b><math>\epsilon = 0.1</math>, <math>\sigma</math> varies</b> | <b><math>\sigma = 7.48</math>, <math>\lambda</math> varies</b> | <b>Gaussian chain</b>                            |
|---------------------------------|----------------------------------------------------------------|----------------------------------------------------------------|----------------------------------------------------------------|--------------------------------------------------|
|                                 | <b><math>\sigma</math>, Å</b>                                  | <b><math>\sigma</math>, Å</b>                                  | <b><math>\lambda</math></b>                                    | <b><math>\langle R^2 \rangle^{1/2}</math>, Å</b> |
| Protein L, 2.5 M<br>GdmCl       | 4.70                                                           | 6.72                                                           | 0.120                                                          | 58.78                                            |
| CspTm, 2.5 M GdmCl              | 5.10                                                           | 7.00                                                           | 0.114                                                          | 61.21                                            |
| Protein L/CspTm, 4 M<br>GdmCl   | 5.50                                                           | 7.14                                                           | 0.108                                                          | 64.22                                            |
| Protein L/CspTm, 7.2<br>M GdmCl | 6.10                                                           | 7.48                                                           | 0.100                                                          | 70.87                                            |
