# Supplementary material
Source: PubMed Central journal article supplement (PMC1785253)

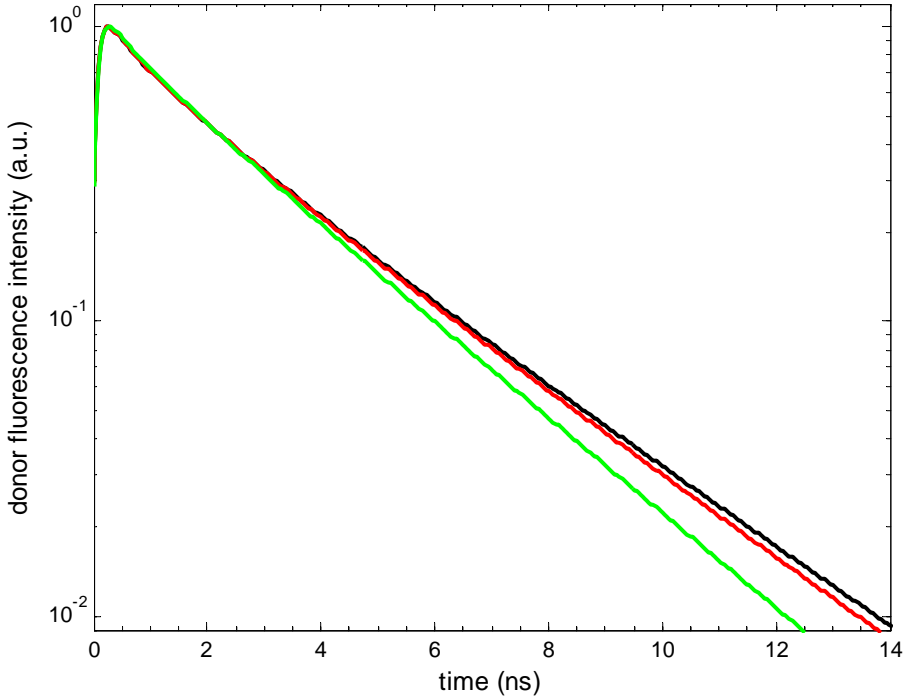

Supplement: pnas_0607097104_1.pdf [file pnas_0607097104_1.pdf]

## Protein L

## Csp Tm

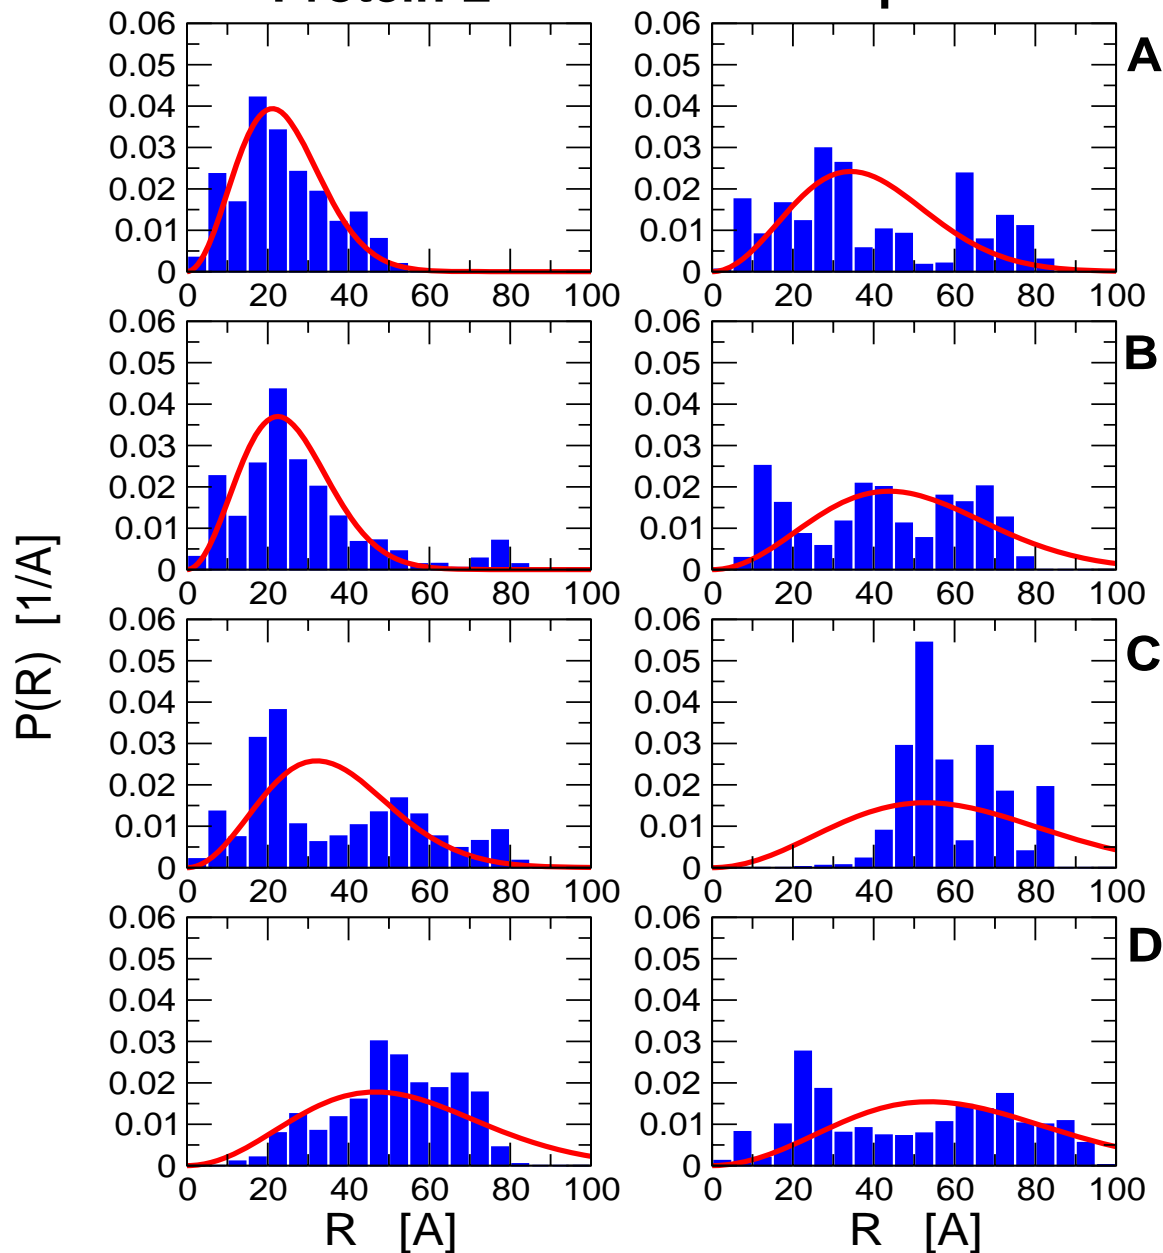

Supplement: pnas_0607097104_2.pdf [file pnas_0607097104_2.pdf]

# Protein L

# Csp Tm

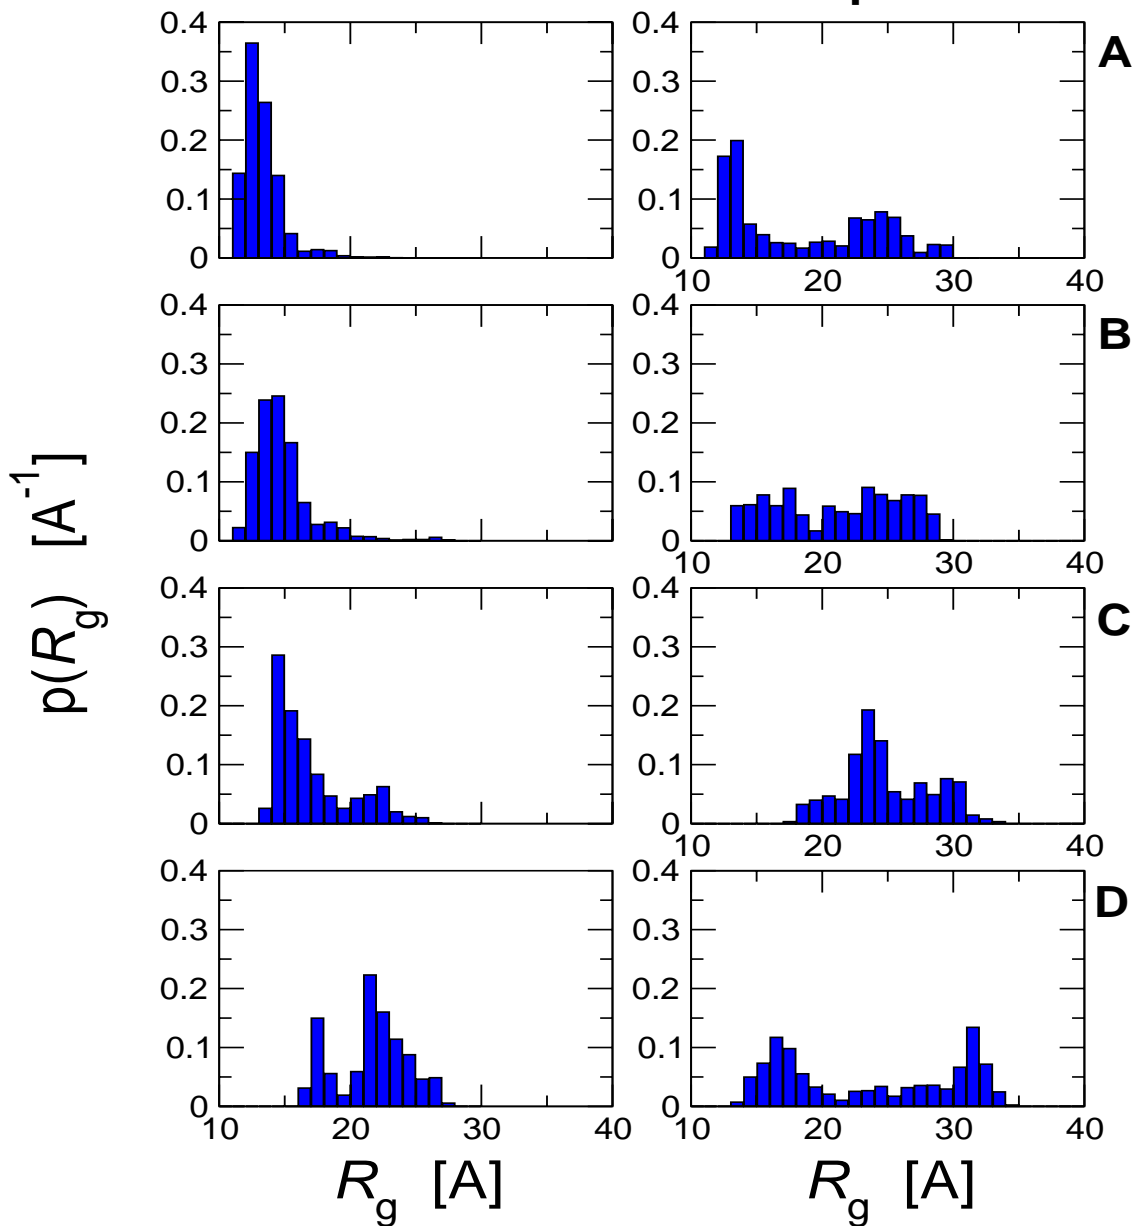

Supplement: pnas_0607097104_3.pdf [file pnas_0607097104_3.pdf]

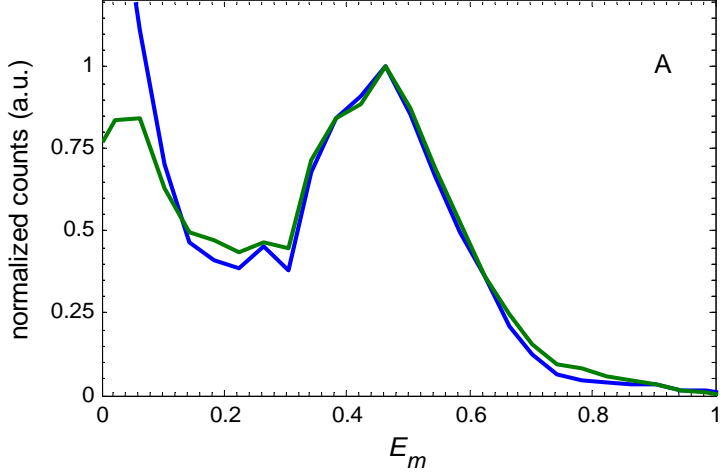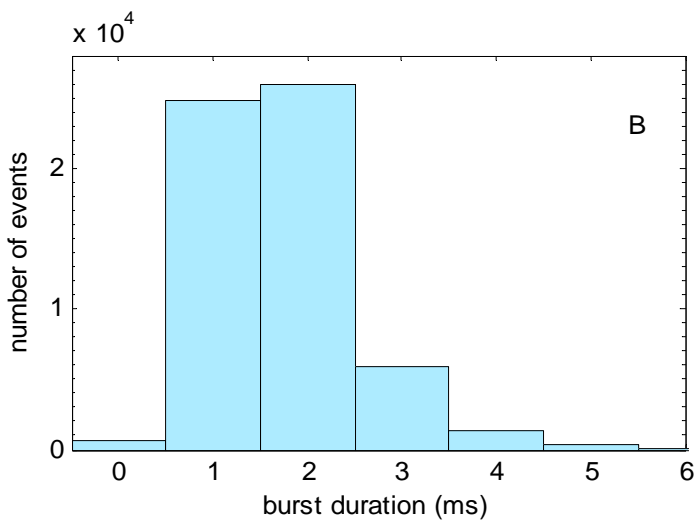

Supplement: pnas_0607097104_4.pdf [file pnas_0607097104_4.pdf]
